# Supplementary material for: Ecological Contacts and Host Specificity Promote Replacement of Nutritional Endosymbionts in Ticks
Source: Springer Nature journal article supplement (doi:10.1007/s00248-021-01773-0), 2021-07-07
Supplement: 248_2021_1773_MOESM1_ESM.pdf [file 248_2021_1773_MOESM1_ESM.pdf]

1 **SUPPLEMENTARY DATA**

2 **Ecological contacts and host specificity promote replacement nutritional**  
3 **endosymbionts in ticks**

4 Microbial Ecology

5 Marie Buysse\*, Florian Binetruy, Raz Leibson, Yuval Gottlieb\* and Olivier Duron\*

6 \* Correspondence: [olivier.duron@ird.fr](mailto:olivier.duron@ird.fr); [marie.buysse@ird.fr](mailto:marie.buysse@ird.fr); [gottlieb.yuval@mail.huji.ac.il](mailto:gottlieb.yuval@mail.huji.ac.il)

7 **Table S1** List and origin of tick species used in this study for multi-locus typing of *Francisella*-LE.

| Tick species                                           | Origin                                                                                     | <i>n</i> | <i>Francisella</i> -LE type | Reference for primary description of <i>Francisella</i> -LE |
|--------------------------------------------------------|--------------------------------------------------------------------------------------------|----------|-----------------------------|-------------------------------------------------------------|
| <b>Argasidae (soft ticks)</b>                          |                                                                                            |          |                             |                                                             |
| <i>Ornithodoros porcinus</i> Walton, 1962              | Laboratory colony derived from field specimens collected in Mahitsy, Madagascar, 2008-2010 | 3        | Obligate endosymbiont       | (1)                                                         |
| <b>Ixodidae (hard ticks)</b>                           |                                                                                            |          |                             |                                                             |
| <i>Amblyomma (Aponomma) latum</i> Koch, 1844           | Collected on vegetation in Gabon, 2016                                                     | 2        | Obligate endosymbiont       | Unpublished data                                            |
| <i>Dermacentor nitens</i> Neumann, 1897                | Collected on domestic horses ( <i>Equus caballus</i> ) in Macouria, French Guiana, 2016    | 2        | Obligate endosymbiont       | Unpublished data                                            |
| <i>Dermacentor occidentalis</i> Marx, 1892             | Collected on vegetation in Hopland, Mendocino Co, California, 1985                         | 3        | Obligate endosymbiont       | (1)                                                         |
| <i>Dermacentor reticulatus</i> (Fabricius, 1794)       | Collected on vegetation in Proveysieux, France, 2011                                       | 1        | Obligate endosymbiont       | (1)                                                         |
| <i>Hyalomma aegyptium</i> (Linnaeus, 1758)             | Collected on an unidentified tortoise species in Yakir, Israel                             | 5        | Obligate endosymbiont       | (2)                                                         |
| <i>Hyalomma excavatum</i> Koch, 1844                   | Collected on cattle ( <i>Bos taurus</i> ) in Mecitözü, Çorum, Turkey, 2011                 | 3        | Obligate endosymbiont       | (1); (2)                                                    |
|                                                        | Collected on vegetation in the Crete island                                                | 1        | Obligate endosymbiont       | Unpublished data                                            |
|                                                        | Collected on domestic horses ( <i>Equus caballus</i> ) in Israel                           | 4        | Obligate endosymbiont       | Unpublished data                                            |
| <i>Hyalomma impeltatum</i> Schulze and Schlottke, 1930 | Collected on unidentified gerbil species in Sde Boker, Israel                              | 5        | Obligate endosymbiont       | (1)                                                         |
| <i>Hyalomma lusitanicum</i> Koch, 1844                 | Collected on vegetation in Veneguera, Canaries, 2010                                       | 1        | Obligate endosymbiont       | (1)                                                         |
| <i>Hyalomma marginatum</i> Koch, 1844                  | Collected on vegetation in South of France                                                 | 1        | Obligate endosymbiont       | (1); (2)                                                    |
|                                                        | Collected on domestic horses ( <i>Equus caballus</i> ) in Israel                           | 3        | Obligate endosymbiont       | Unpublished data                                            |
| <i>Hyalomma rufipes</i> Koch, 1844                     | Collected on various bird species at birding stations in Eilat and Jerusalem, Israel       | 7        | Obligate endosymbiont       | (2)                                                         |
| <i>Ixodes ricinus</i> (Linnaeus, 1758)                 | Collected on vegetation in diverse regions of France                                       | 7        | Facultative endosymbiont    | Unpublished data                                            |
| <i>Ixodes scapularis</i> Say, 1821                     | Collected on vegetation at Queen's biology station, Ontario, Canada, 2013                  | 2        | Facultative endosymbiont    | (1)                                                         |
| <i>Rhipicephalus decoloratus</i> Koch, 1844            | Collected on zebu ( <i>Bos indicus</i> ) in Burkina-Faso, 2013                             | 1        | Facultative endosymbiont    | (1)                                                         |

8

9 **Table S2** Genes and primers used in polymerase chain reaction (PCR) assays for multi-locus typing of *Francisella*-LE. Nested and semi-nested PCR assays were performed as  
10 follows: The first PCR run with the external primers was performed in a 10- $\mu$ L volume containing 20–50 ng of genomic DNA, 3 mM of each dNTP (Thermo Scientific), 8 mM of  
11 MgCl<sub>2</sub> (Roche Diagnostics), 3  $\mu$ M of each primer, 1  $\mu$ L of 10 $\times$  PCR buffer (Roche Diagnostics), and 0.5 U of Taq DNA polymerase (Roche Diagnostics). A 1- $\mu$ L aliquot of the PCR  
12 product from the first reaction was then used as a template for the second round of amplification. The second PCR was performed in a total volume of 25  $\mu$ L and contained 8 mM of  
13 each dNTP (Thermo Scientific), 10 mM of MgCl<sub>2</sub> (ThermoScientific), 7.5  $\mu$ M of each of the internal primers, 2.5  $\mu$ L of 10 $\times$ PCR buffer (Thermo Scientific), and 1.25 U of Taq DNA  
14 polymerase (Thermo Scientific). All PCR rounds were performed under the following conditions: initial denaturation at 93°C for 3 min, 35 cycles of denaturation (93°C, 30 s),  
15 annealing (T<sub>m</sub>=50–56°C, depending on primers, 30 s), extension (72°C, 1–2 min), and a final extension at 72°C for 5 min.

| Gene         | Hypothetical product                   | Primers (5'-3') | T <sub>m</sub>           | Fragment size |                                                                                                                                                                             |
|--------------|----------------------------------------|-----------------|--------------------------|---------------|-----------------------------------------------------------------------------------------------------------------------------------------------------------------------------|
| 16S rRNA     | Small ribosomal subunit                | FRCL_16S_F1     | GCTATCTACTTCTGGAGCAACCC  | 52°C          | 1st round PCR: FRCL_16S_F1/FRCL_16S_R2: 1 295bp<br>2nd round PCR (fragment 1): FRCL_16S_F1/FRCL_16S_R1: 773bp<br>2nd round PCR (fragment 2): FRCL_16S_F2/FRCL_16S_R2: 685bp |
|              |                                        | FRCL_16S_F2     | CCAACAGCTAGTACTCATCGT    |               |                                                                                                                                                                             |
|              |                                        | FRCL_16S_R1     | AGAGTACGGTAGAGGAATGGG    |               |                                                                                                                                                                             |
|              |                                        | FRCL_16S_R2     | GGATACCAGTTGGAAACGAC     |               |                                                                                                                                                                             |
| <i>rpoB</i>  | DNA-directed RNA polymerase beta chain | FRCL_rpoB_F2    | GAGGCACACTTAGGTTTAGYTTC  | 56°C          | 1st round PCR: FRCL_rpoB_F2/FRCL_rpoB_R2: 420bp<br>2nd round PCR: FRCL_rpoB_F2/FRCL_rpoB_R1: 379bp                                                                          |
|              |                                        | FRCL_rpoB_R1    | GCATATACATATAACCAACTG    |               |                                                                                                                                                                             |
|              |                                        | FRCL_rpoB_R2    | CTAAACTATATGARCCAGTYGACC |               |                                                                                                                                                                             |
| <i>groEL</i> | Chaperone protein GROEL                | FRCL_groEL_F1   | CAGATGAAGCTCGTACA        | 50°C          | 1st round PCR: FRCL_groEL_F1/FRCL_groEL_R2: 1 171bp<br>2nd round PCR: FRCL_groEL_F1/FRCL_groEL_R1: 981bp                                                                    |
|              |                                        | FRCL_groEL_R1   | TCACCAGCACCATCAATG       |               |                                                                                                                                                                             |
|              |                                        | FRCL_groEL_R2   | GCATCATCKACACGATC        |               |                                                                                                                                                                             |
| <i>ftsZ</i>  | Cell division protein FtsZ             | FRCL_ftsZ_F1    | CAGCATATGTGTGAAGAGG      | 52°C          | 1st round PCR: FRCL_ftsZ_F1/FRCL_ftsZ_R2: 804bp<br>2nd round PCR: FRCL_ftsZ_F1/FRCL_ftsZ_R1: 713bp                                                                          |
|              |                                        | FRCL_ftsZ_R1    | GACATATCCATACCAGCTG      |               |                                                                                                                                                                             |
|              |                                        | FRCL_ftsZ_R2    | ACCAGCTATCACGATAGCC      |               |                                                                                                                                                                             |
| <i>gyrB</i>  | DNA gyrase subunit B                   | FRCL_gyrB_F1    | GGTAAGCTGGCAGACTGTC      | 56°C          | 1st round PCR: FRCL_gyrB_F1/FRCL_gyrB_R2: 1 145bp                                                                                                                           |

FRCL\_gyrB\_R1 CCAAAGCTGACCAGGGTTCA  
FRCL\_gyrB\_R2 CGTGGCTCCACYTCATCACC

2nd round PCR: FRCL\_gyrB\_F1/FRCL\_gyrB\_R1: 1 035bp

---

17 **Table S3** Key traits of the 29 tick species infected by *Francisella*-LE used in this study.

| Tick species infected by <i>Francisella</i> -LE | Key traits             |                         |                             |                             |
|-------------------------------------------------|------------------------|-------------------------|-----------------------------|-----------------------------|
|                                                 | Tick family            | Geographic distribution | Feeding preferences         | <i>Francisella</i> -LE type |
| <i>Ornithodoros porcinus</i>                    | Argasidae (soft ticks) | Old World               | Mammals                     | Obligate endosymbiont       |
| <i>Ornithodoros moubata</i>                     | Argasidae (soft ticks) | Old World               | Mammals                     | Obligate endosymbiont       |
| <i>Argas arboreus</i>                           | Argasidae (soft ticks) | Old World               | Birds                       | Unknown                     |
| <i>Amblyomma latum</i>                          | Ixodidae (hard ticks)  | Old World               | Reptiles                    | Obligate endosymbiont       |
| <i>Amblyomma dissimile</i>                      | Ixodidae (hard ticks)  | New World               | Reptiles                    | Obligate endosymbiont       |
| <i>Amblyomma geayi</i>                          | Ixodidae (hard ticks)  | New World               | Mammals                     | Facultative endosymbiont    |
| <i>Amblyomma goeldii</i>                        | Ixodidae (hard ticks)  | New World               | Mammals                     | Obligate endosymbiont       |
| <i>Amblyomma humerale</i>                       | Ixodidae (hard ticks)  | New World               | Reptiles                    | Obligate endosymbiont       |
| <i>Amblyomma latepunctatum</i>                  | Ixodidae (hard ticks)  | New World               | Mammals                     | Facultative endosymbiont    |
| <i>Amblyomma longirostre</i>                    | Ixodidae (hard ticks)  | New World               | Mammals and birds           | Obligate endosymbiont       |
| <i>Amblyomma maculatum</i>                      | Ixodidae (hard ticks)  | New World               | Mammals and birds           | Obligate endosymbiont       |
| <i>Amblyomma oblongoguttatum</i>                | Ixodidae (hard ticks)  | New World               | Mammals                     | Obligate endosymbiont       |
| <i>Amblyomma pacae</i>                          | Ixodidae (hard ticks)  | New World               | Mammals                     | Obligate endosymbiont       |
| <i>Amblyomma paulopunctatum</i>                 | Ixodidae (hard ticks)  | Old World               | Mammals                     | Obligate endosymbiont       |
| <i>Amblyomma rotundatum</i>                     | Ixodidae (hard ticks)  | New World               | Reptiles                    | Obligate endosymbiont       |
| <i>Amblyomma sculptum</i>                       | Ixodidae (hard ticks)  | New World               | Mammals                     | Facultative endosymbiont    |
| <i>Amblyomma varium</i>                         | Ixodidae (hard ticks)  | New World               | Mammals and birds           | Obligate endosymbiont       |
| <i>Dermacentor nitens</i>                       | Ixodidae (hard ticks)  | New World               | Mammals                     | Obligate endosymbiont       |
| <i>Dermacentor occidentalis</i>                 | Ixodidae (hard ticks)  | New World               | Mammals                     | Obligate endosymbiont       |
| <i>Dermacentor reticulatus</i>                  | Ixodidae (hard ticks)  | Old World               | Mammals                     | Obligate endosymbiont       |
| <i>Hyalomma aegyptium</i>                       | Ixodidae (hard ticks)  | Old World               | Reptiles                    | Obligate endosymbiont       |
| <i>Hyalomma excavatum</i>                       | Ixodidae (hard ticks)  | Old World               | Mammals and birds           | Obligate endosymbiont       |
| <i>Hyalomma impeltatum</i>                      | Ixodidae (hard ticks)  | Old World               | Mammals and birds           | Obligate endosymbiont       |
| <i>Hyalomma lusitanicum</i>                     | Ixodidae (hard ticks)  | Old World               | Mammals and birds           | Obligate endosymbiont       |
| <i>Hyalomma marginatum</i>                      | Ixodidae (hard ticks)  | Old World               | Mammals and birds           | Obligate endosymbiont       |
| <i>Hyalomma rufipes</i>                         | Ixodidae (hard ticks)  | Old World               | Mammals and birds           | Obligate endosymbiont       |
| <i>Ixodes ricinus</i>                           | Ixodidae (hard ticks)  | Old World               | Mammals, birds and reptiles | Facultative endosymbiont    |
| <i>Ixodes scapularis</i>                        | Ixodidae (hard ticks)  | New World               | Mammals and birds           | Facultative endosymbiont    |
| <i>Rhipicephalus decoloratus</i>                | Ixodidae (hard ticks)  | Old World               | Mammals                     | Facultative endosymbiont    |

18

19 **Figure legends**

20 **Fig. S1** *Francisella* phylogenetic tree constructed using maximum-likelihood (ML) estimations based on 16S  
21 rRNA nucleotidic sequences (695 unambiguously aligned bp; best-fit approximation for the evolutionary model:  
22 HKY+G) from *Francisella*-LE of 29 tick species and from other *Francisella* species. Branch numbers indicate  
23 percentage bootstrap support (1 000 replicates). Only bootstrap supports >70% are shown. The scale bar is in  
24 units of substitution/site. \*, *Francisella*-LE sequences obtained in this study. *Francisella*-LE sequences are  
25 indicated by a blue font.

26

27 **Fig. S2** *Francisella* phylogenetic tree constructed using maximum-likelihood (ML) estimations based on *rpoB*  
28 nucleotidic sequences (379 unambiguously aligned bp; best-fit approximation for the evolutionary model:  
29 TN93+I) from *Francisella*-LE of 29 tick species and from other *Francisella* species. Branch numbers indicate  
30 percentage bootstrap support (1 000 replicates). Only bootstrap supports >70% are shown. The scale bar is in  
31 units of substitution/site. \*, *Francisella*-LE obtained in this study. *Francisella*-LE sequences are indicated by a  
32 blue font.

33

34 **Fig. S3** *Francisella* phylogenetic tree constructed using maximum-likelihood (ML) estimations based on *groEL*  
35 nucleotidic sequences (981 unambiguously aligned bp; best-fit approximation for the evolutionary model:  
36 TN93+G) from *Francisella*-LE of 29 tick species and from other *Francisella* species. Branch numbers indicate  
37 percentage bootstrap support (1 000 replicates). Only bootstrap supports >70% are shown. The scale bar is in  
38 units of substitution/site. \*, *Francisella*-LE obtained in this study. *Francisella*-LE sequences are indicated by a  
39 blue font.

40

41 **Fig. S4** *Francisella* phylogenetic tree constructed using maximum-likelihood (ML) estimations based on *ftsZ*  
42 nucleotidic sequences (713 unambiguously aligned bp; best-fit approximation for the evolutionary model:  
43 GTR+G) from *Francisella*-LE of 29 tick species and from other *Francisella* species. Branch numbers indicate  
44 percentage bootstrap support (1 000 replicates). Only bootstrap supports >70% are shown. The scale bar is in  
45 units of substitution/site. \*, *Francisella*-LE obtained in this study. *Francisella*-LE sequences are indicated by a  
46 blue font.

47

48 **Fig. S5** *Francisella* phylogenetic tree constructed using maximum-likelihood (ML) estimations based on *gyrB*  
49 nucleotidic sequences (1,035 unambiguously aligned bp; best-fit approximation for the evolutionary model:  
50 GTR+G+I) from *Francisella*-LE of 29 tick species and from other *Francisella* species. Branch numbers indicate  
51 percentage bootstrap support (1 000 replicates). Only bootstrap supports >70% are shown. The scale bar is in  
52 units of substitution/site. \*, *Francisella*-LE obtained in this study. *Francisella*-LE sequences are indicated by a  
53 blue font.

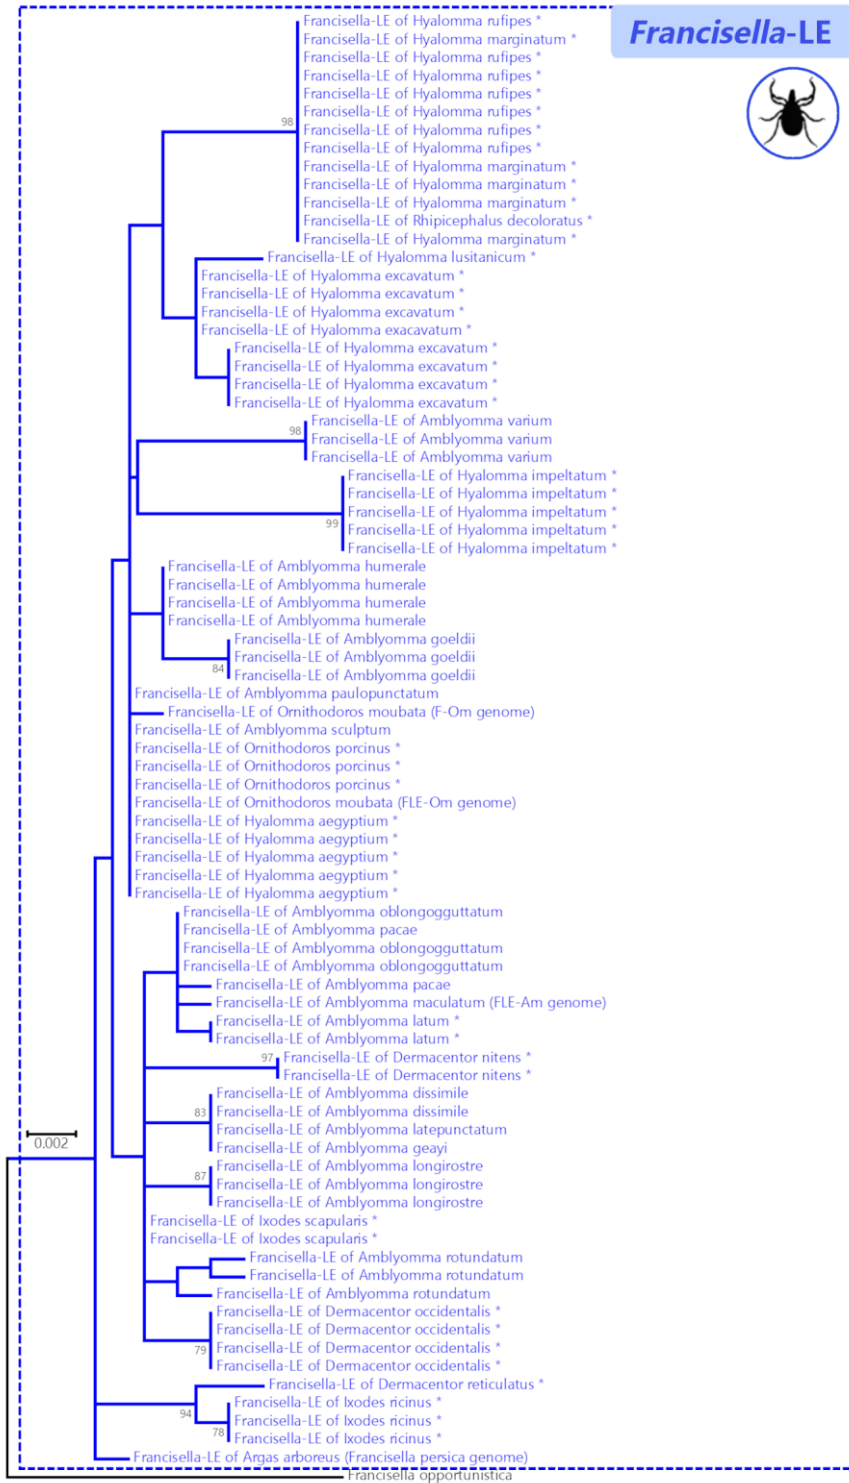

54

55

**Fig. S1**



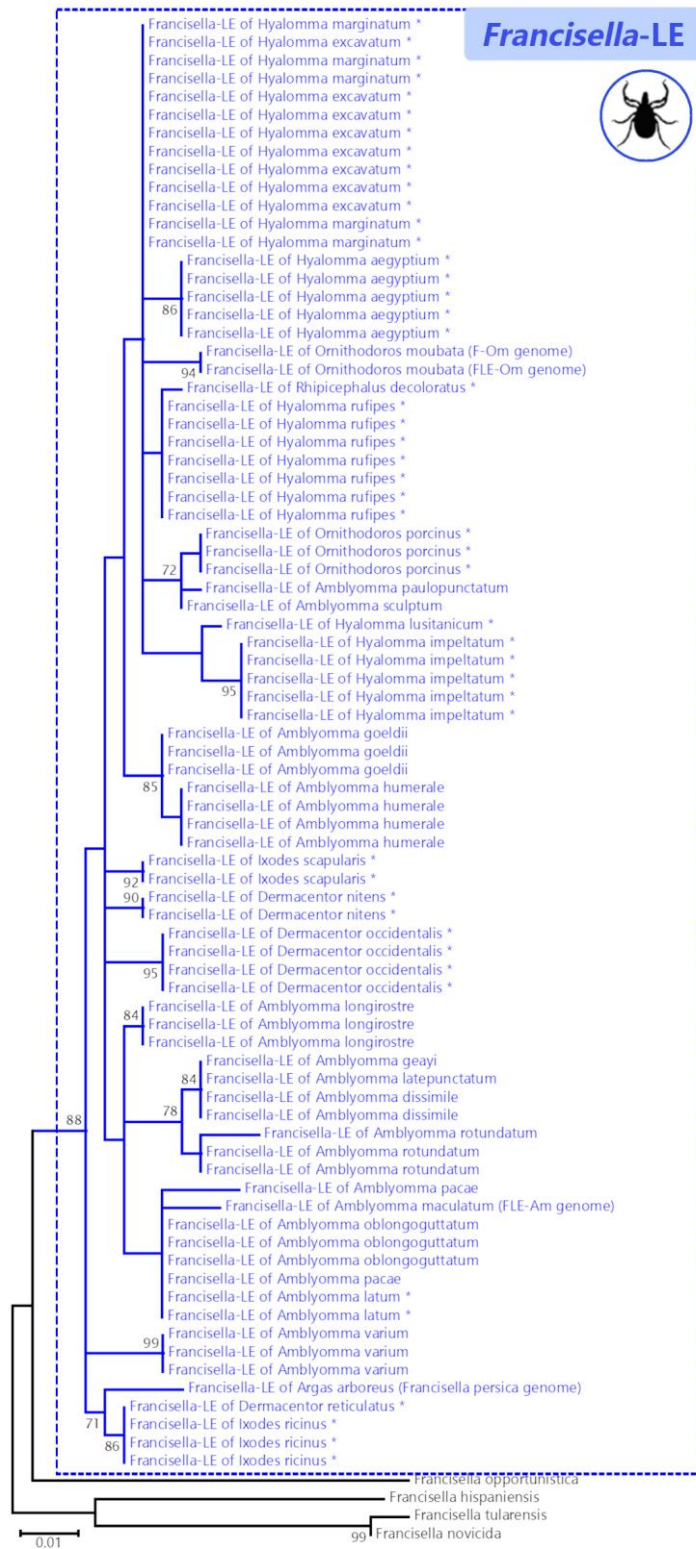

56

57

**Fig. S2**

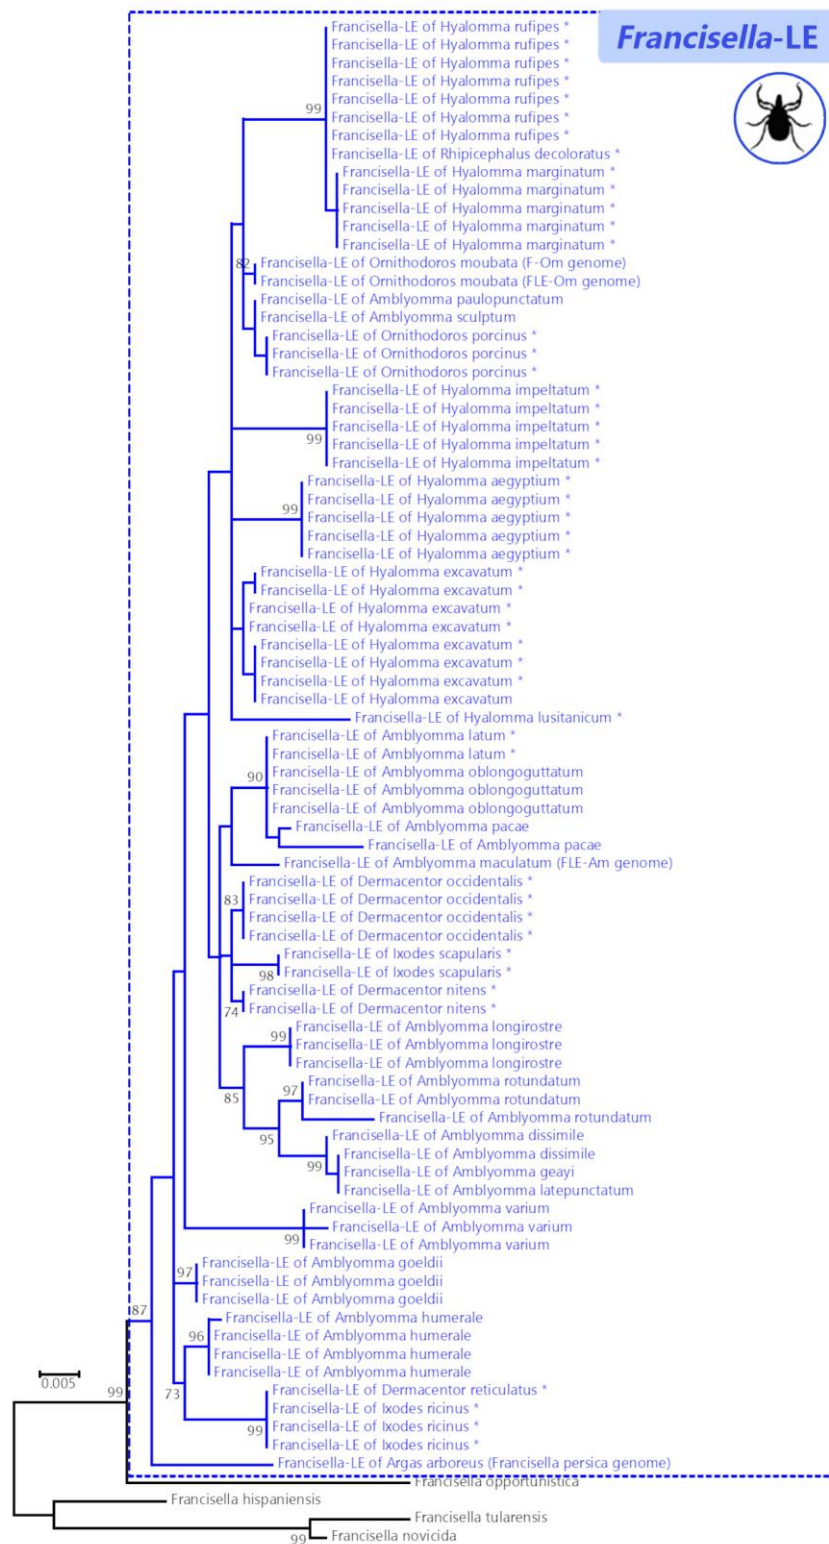

58

59

**Fig. S3**

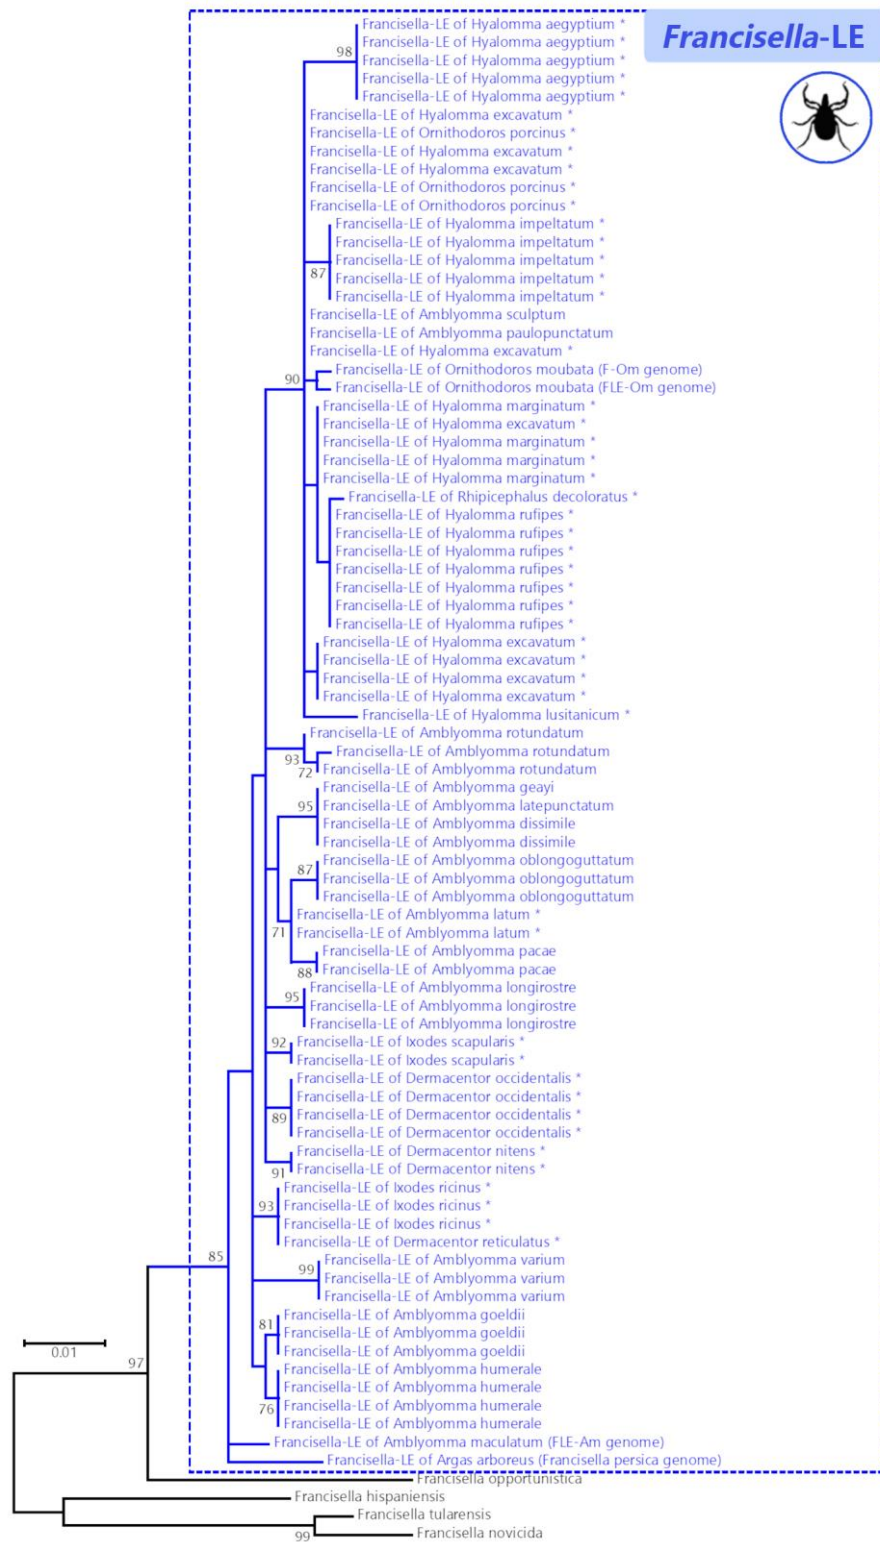

60

61

**Fig. S4**

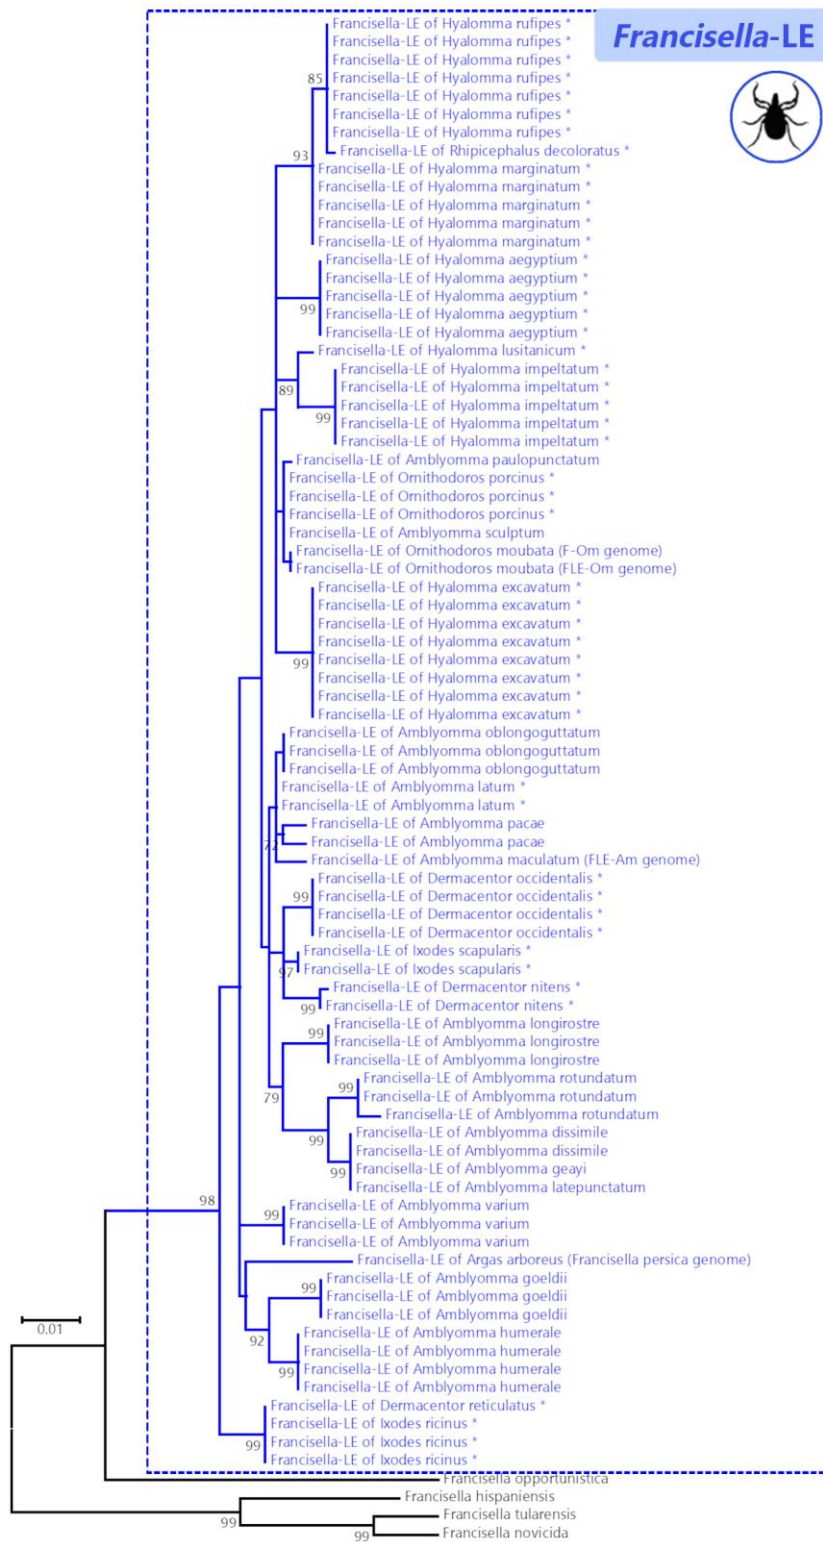

62

63

**Fig. S5**

64 **Supplementary references**

- 65 1. Duron O, Binetruy F, Noel V, Cremaschi J, McCoy K, Arnathau C, Plantard O, Goolsby J, Perez De  
66 Leon AA, Heylen DJA, Raoul Van Oosten A, Gottlieb Y, Baneth G, Guglielmone AA, Estrada-Pena A,  
67 Opara MN, Zenner L, Vavre F, Chevillon C. 2017. Evolutionary changes in symbiont community  
68 structure in ticks. *Mol Ecol* 26:2905–2921.
- 69 2. Azagi T, Klement E, Perlman G, Lustig Y, Mumcuoglu KY, Apanaskevich DA, Gottlieb Y. 2017.  
70 *Francisella*-like endosymbionts and *Rickettsia* species in local and imported *Hyalomma* ticks. *Appl*  
71 *Environ Microbiol* 83:1–14.

72
